# Supplementary material
Source: PubMed Central journal article supplement (PMC3199314)
Supplement: NIHMS307497-supplement-01.pdf [file NIHMS307497-supplement-01.pdf]

## Supplement Table 1

## Relationship between aKIR expressers and the presence of ligand

|                  | Donor      |                 |                     | Recipients           |      |                 |      |                      |
|------------------|------------|-----------------|---------------------|----------------------|------|-----------------|------|----------------------|
|                  | expressers | null-expressers | p value             | expressers           |      | null-expressers |      | p value              |
|                  |            |                 |                     | CMV+                 | CMV- | CMV+            | CMV- |                      |
| KIR2DS2 (donor)  |            |                 |                     |                      |      |                 |      |                      |
| C1/C1            | 4          | 4               | p=0.59 <sup>b</sup> | 16                   | 6    | 3               | 2    | p= 1.00 <sup>a</sup> |
| C1/C2            | 10         | 3               |                     | 23                   | 7    | 3               | 3    |                      |
| C2/C2            | 2          | 1               |                     | 7                    | 3    | 0               | 0    |                      |
|                  |            |                 |                     | p=0.86 <sup>b</sup>  |      |                 |      |                      |
| KIR2DS4 (donor)  |            |                 |                     |                      |      |                 |      |                      |
| HLA A*11:01      | 8          | 1               | p=1.00 <sup>b</sup> | 8                    | 5    | 0               | 0    | p=0.30 <sup>a</sup>  |
| no HLA A11       | 28         | 5               |                     | 51                   | 15   | 1               | 3    |                      |
|                  |            |                 |                     | p=0.30 <sup>b</sup>  |      |                 |      |                      |
| C*02,*05,*14,*16 |            |                 |                     |                      |      |                 |      |                      |
| No               | 3          | 0               | p=1.00 <sup>b</sup> | 10                   | 2    | 0               | 0    | p=0.72 <sup>a</sup>  |
| C*02,*05,*14,*16 | 33         | 6               |                     | 49                   | 16   | 3               | 3    |                      |
|                  |            |                 |                     | p= 0.72 <sup>b</sup> |      |                 |      |                      |

a: Cochran-Mantel-Haenszel test

b: Fisher's exact test
