# Supplementary material
Source: PubMed Central journal article supplement (PMC3199314)
Supplement: NIHMS307497-supplement-02.pdf [file NIHMS307497-supplement-02.pdf]

**Supplement Figure 1**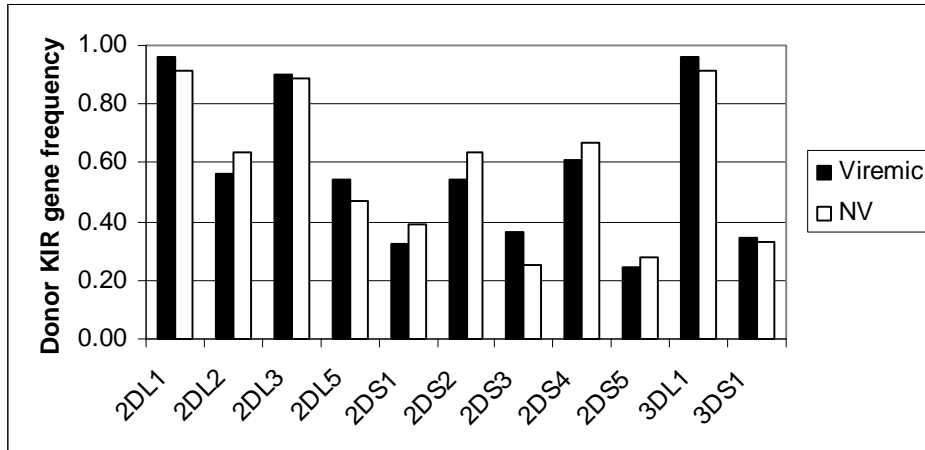

Supplement Figure 1. Donor KIR gene frequency in the CMV Viremic and non-viremic group. As a condition, the donor KIR2DS2 or KIR2DS4 gene had to be present in this cohort.
