# Supplementary material
Source: PubMed Central journal article supplement (PMC3199314)
Supplement: NIHMS307497-supplement-03.pdf [file NIHMS307497-supplement-03.pdf]

## Supplement Figure 2

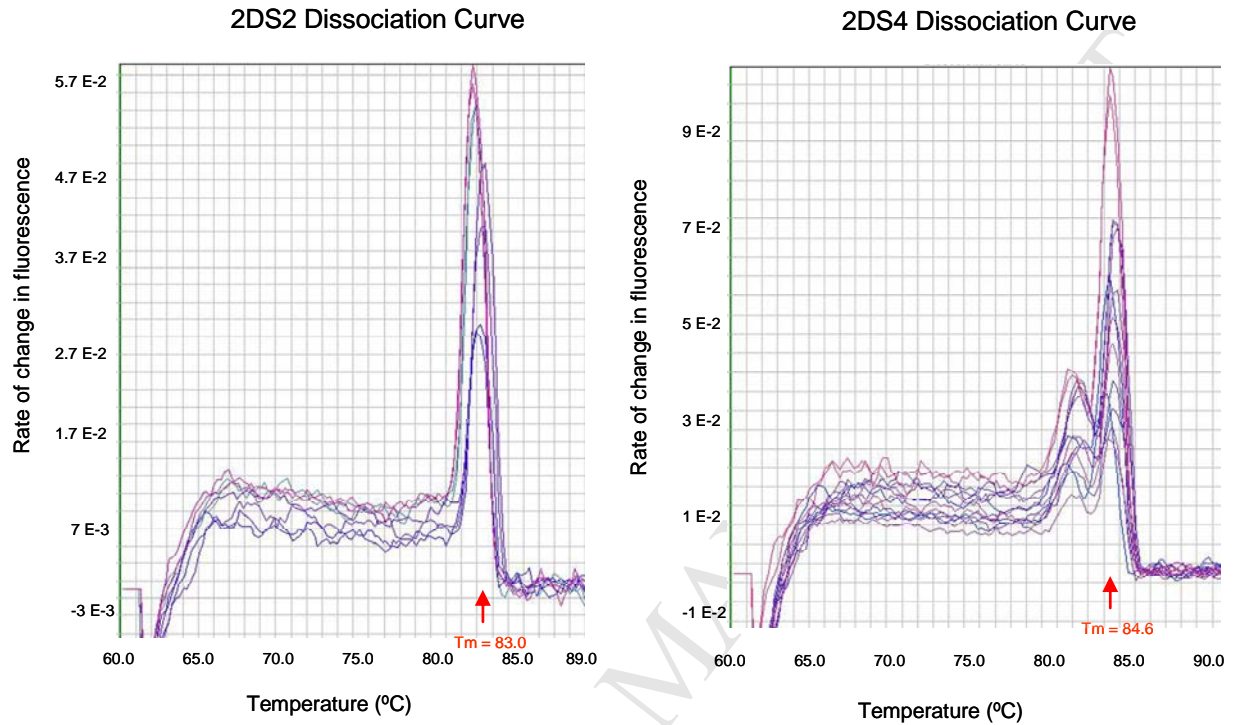

Supplement Figure 2. Dissociation curve for KIR2DS2 and KIR 2DS4 amplified products. All PCR products were reported only after assesement for the correct dissociation curve.
